# Supplementary material for: Changes in CSR Ecological Strategies of Plants and Communities Following the Introduction and Restoration of Woody Plants in Semi-arid Damaged Steppe Grasslands
Source: Research Square preprint supplement (doi:10.21203/rs.3.rs-2760417/v1), 2023-04-03
Supplement: Supplementary file 1 [file c0f64a43a4972655835d1d58.pdf]

Dear Editor-in-chief

I submit supplementary materials for the manuscript. The details of the manuscript are as follows, and the Supplementary Material begins on pp. 2-6.

**Article title:** Changes in CSR Ecological Strategies of Plants and Communities Following the Introduction and Restoration of Woody Plants in Semi-arid Damaged Steppe Grasslands

**Journal name:** Biodiversity and Conservation

**Author names:** Eui-Joo Kim, Seung-Hyuk Lee, Jae-Hoon Park, Ji-Won Park, Jung-Min Lee, Yoon-Seo Kim, Se-Hee Kim, Sung-Bae Joo, Kyung-Mi Cho, Young-Han You

**Affiliation and e-mail address of the corresponding author:** Department of Life Sciences, 56 Gongjudaehak-ro, Gongju-si, Chungcheongnam-do, Republic of Korea and E-mail: youeco21@kongju.ac.kr

Thank you in advance.

Sincerely,

Young Han You

Supplementary

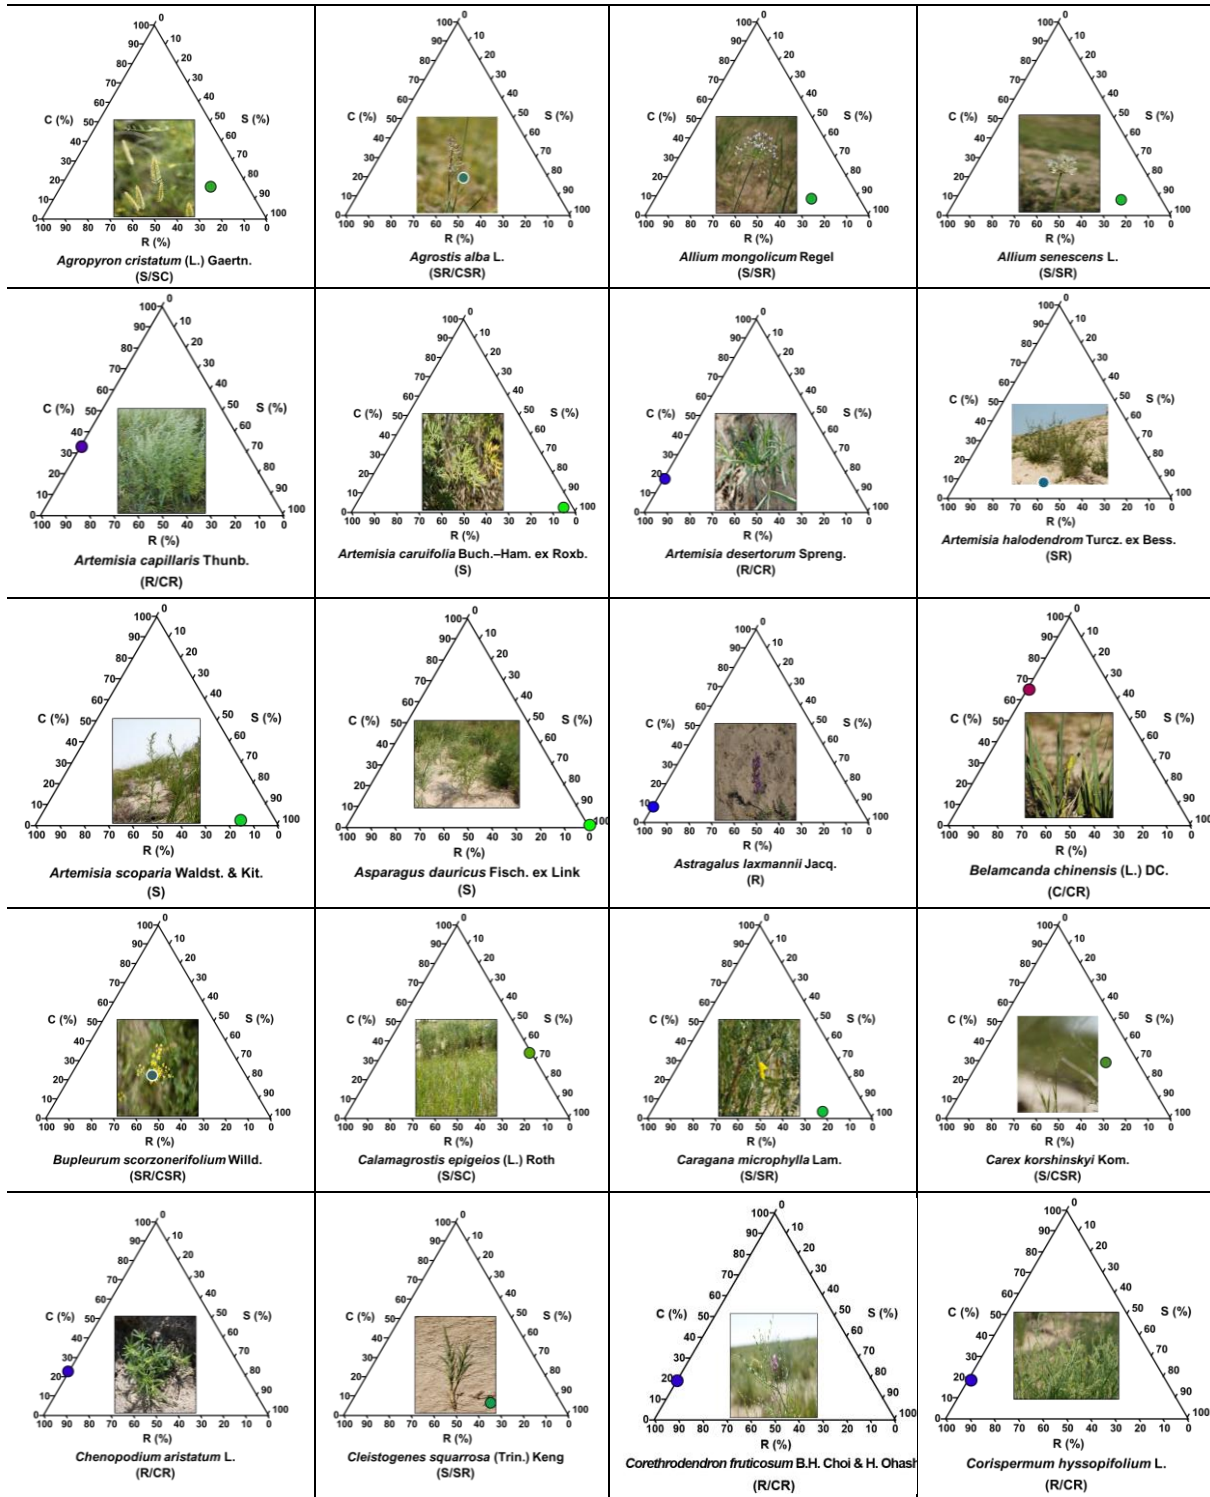

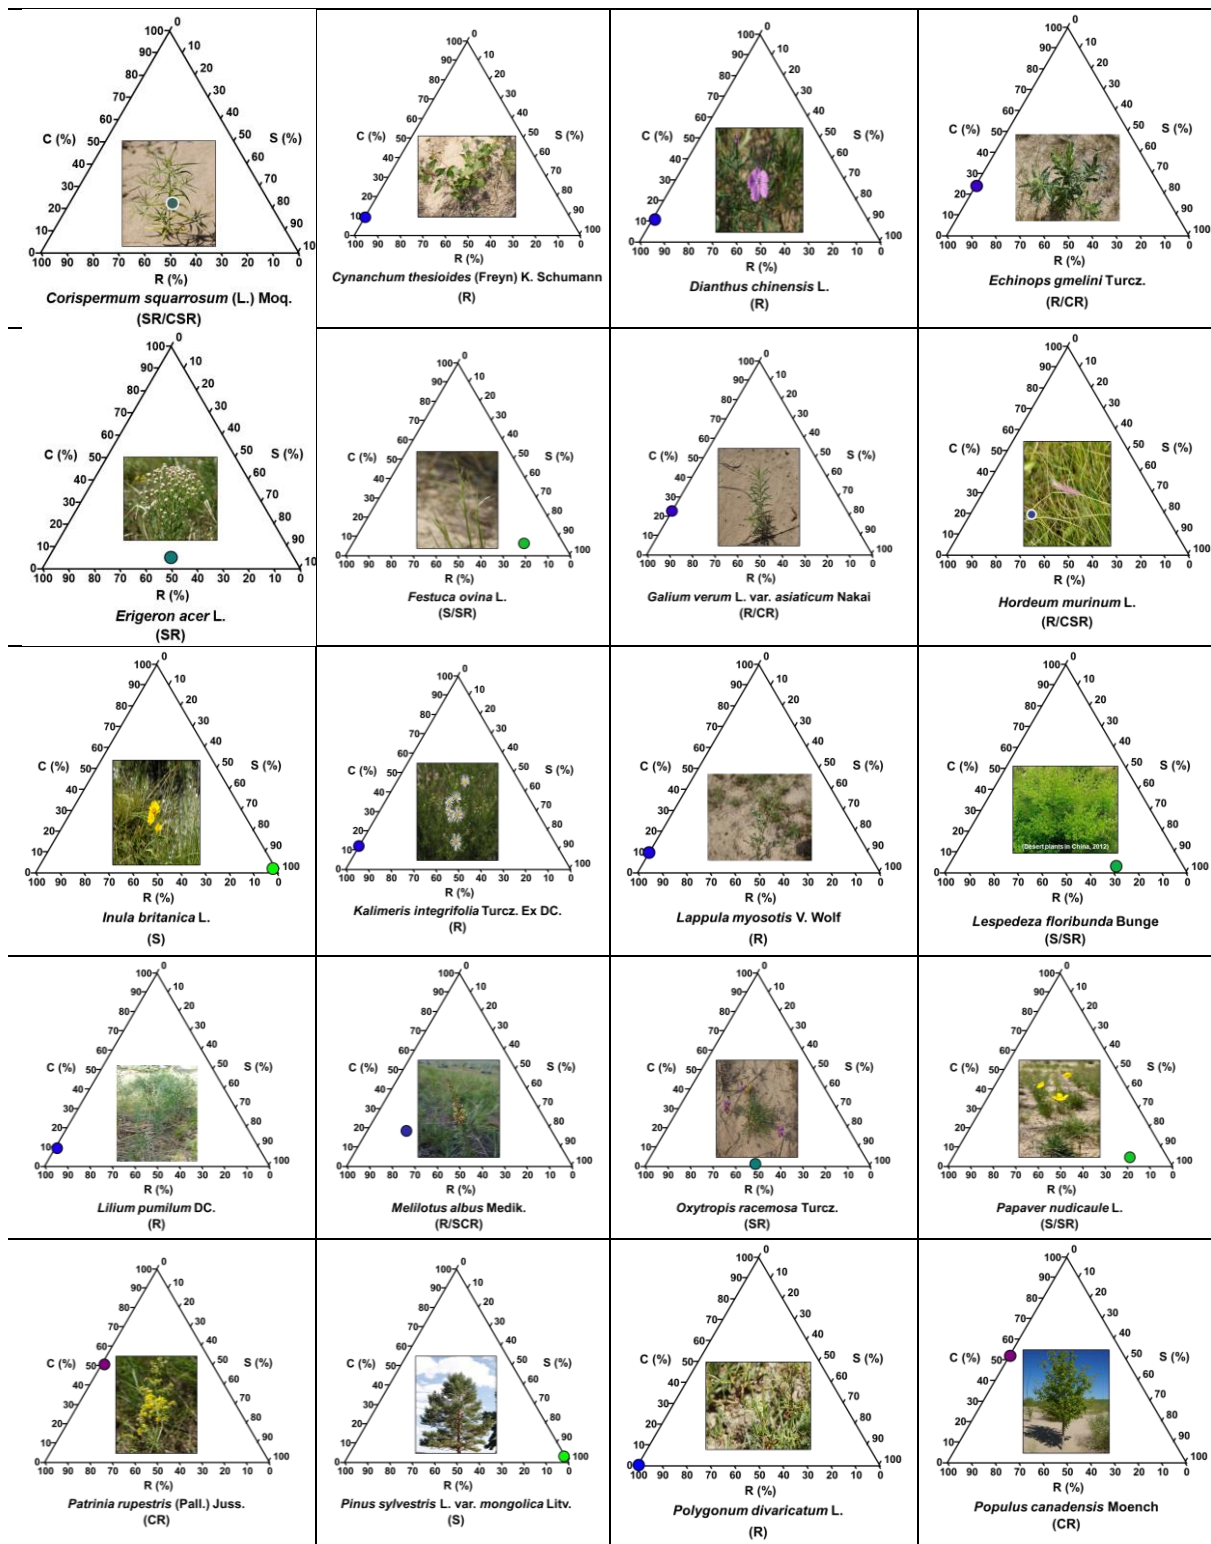

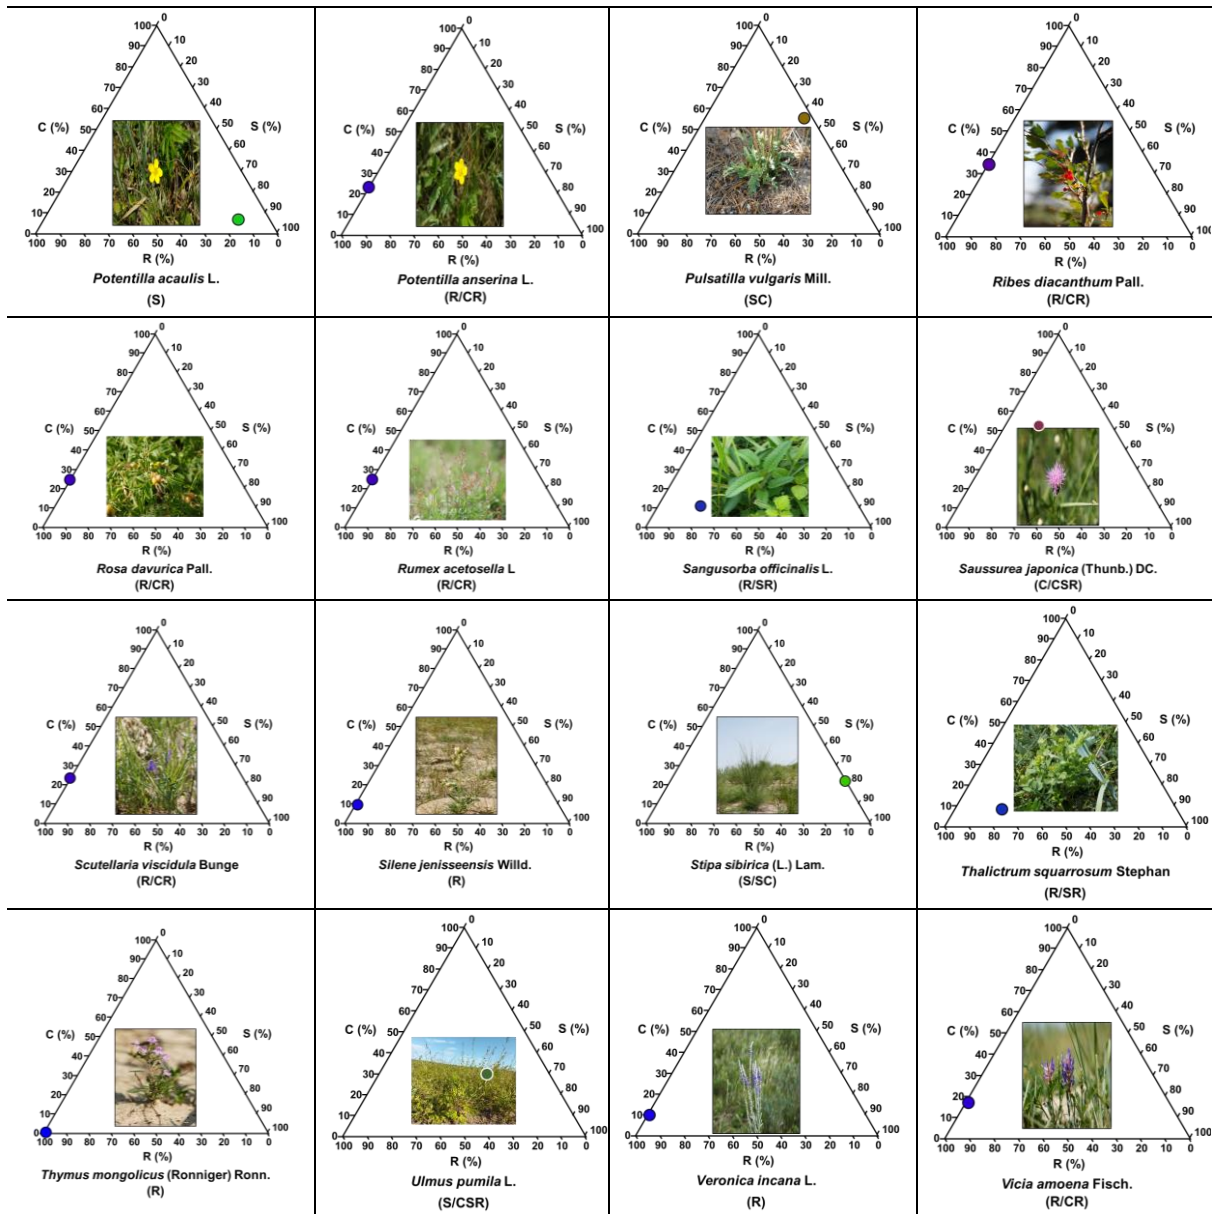

SI 1. Scientific names and CSR ecological strategy types of plants that appeared in Hulunbuir Research Stations and their photos

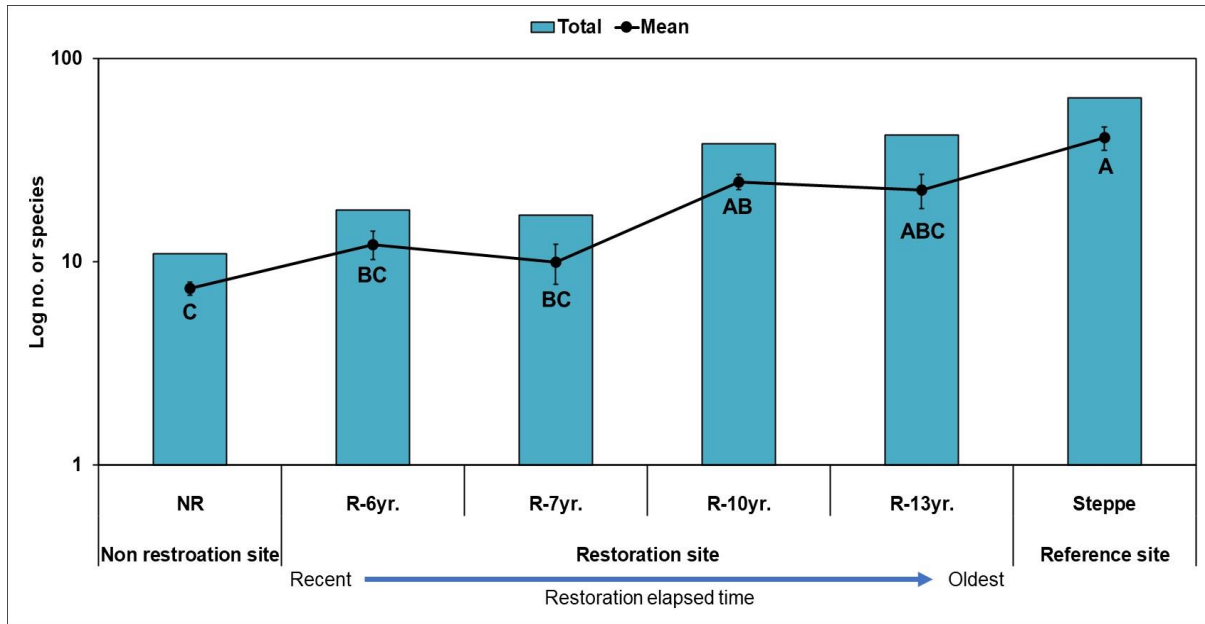

**SI 2.** Comparison of plant biodiversity by research site in Hulunbuir for 5 years (2014 – 2018). Black dots represent the average number of plant species detected and error bars represent the standard deviation. Blue bars mean the total number of species present and alphabet in blue bar mean differences in mean number of species per study site. NR: site of non-restoration, R-arabic numeral yr.: site of year time after restoration. Steppe includes both temperate typical steppe (TTS) and woodland steppe (WS)

**SI 3.** The vegetation decline of desertification areas of Horqin(Squires et al., 2009) and process of ecosystem restoration according the vegetation restoration of Hulunbeier in Inner Mongolia

|                                                             | Division                                | Vegetation type                                                                                                                                                         | Landform               | Vegetation type                                                                                                     |                                                                  |
|-------------------------------------------------------------|-----------------------------------------|-------------------------------------------------------------------------------------------------------------------------------------------------------------------------|------------------------|---------------------------------------------------------------------------------------------------------------------|------------------------------------------------------------------|
| Changes of vegetation due to desertification in Horqin area | Natural vegetation                      | <u><i>Populus simonii</i></u><br><u><i>Salix matsudana</i></u><br><i>Salix gordejevii</i><br><i>Prunus armeniaca</i><br><u><i>Ulmus pumila</i></u><br>and other species | Original ecosystem     | Reference sites<br>(Steppe)<br>- TTS<br>- WS                                                                        | Changes of vegetation according to the restoration in Hulunbeier |
|                                                             |                                         |                                                                                                                                                                         | ☉                      | ┌                                                                                                                   |                                                                  |
|                                                             | Primary change                          | <u><i>Agropyron cristatum</i></u><br><i>Pennisetum flaeacidum</i>                                                                                                       | Fixed sand dune        | <u><i>Agropyron cristatum</i></u><br>- R-13yr.                                                                      |                                                                  |
|                                                             |                                         |                                                                                                                                                                         | ☉                      | ┌                                                                                                                   |                                                                  |
|                                                             | Secondary change                        | <u><i>Caragana microphylla</i></u><br><i>Setaria viridis</i>                                                                                                            | Semi-fixed sand dune   | <u><i>Caragana microphylla</i></u><br>- R-13yr.<br>- R-10yr.<br>- R-7yr.                                            |                                                                  |
|                                                             |                                         |                                                                                                                                                                         | ☉                      | ┌                                                                                                                   |                                                                  |
|                                                             | Tertiary change                         | <u><i>Artemisia halodendron</i></u><br><u><i>Corispermum hyssopifolium</i></u><br><i>Salsola collina</i>                                                                | Semi-shifted sand dune | <u><i>Artemisia halodendron</i></u><br><u><i>Corispermum hyssopifolium</i></u><br>- R-10yr.<br>- R-7yr.<br>- R-6yr. |                                                                  |
|                                                             |                                         |                                                                                                                                                                         | ☉                      | ┌                                                                                                                   |                                                                  |
| Quarternary change                                          | <i>Agiophyllum arenarium</i><br>or none | Shifted sand dune                                                                                                                                                       | - NR                   |                                                                                                                     |                                                                  |

\* Underline : same species
